# Supplementary material
Source: PubMed Central journal article supplement (PMC4070750)

**Figure S1 Mass spectrometric analysis of the purified ~8.5/9 kDa band indicates the presence of a non-covalent A $\beta$ 1-40 dimer.** MALDI-TOF mass spectra for A $\beta$ <sub>1-40</sub> peptide fragments resulting from lysC digest of purified 7PA2-derived A $\beta$  from Figure 2C. Masses for individual LC peaks corresponding to peptide fragments 1-16, 17-28 and 29-40. A.U. denotes arbitrary units, and quaternary, tertiary, doubly or singly protonated fragments are indicated by (+4), (+3), (+2) and (+1), respectively.

# Figure S1

(A)

1-16 peptide mass spectrum

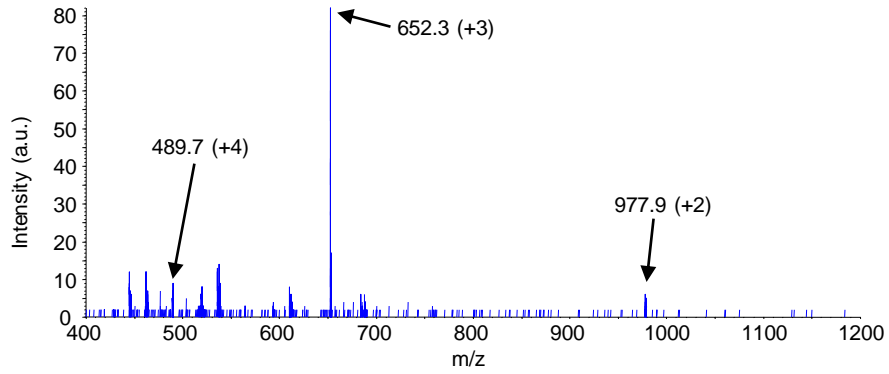

(B)

17-28 peptide mass spectrum

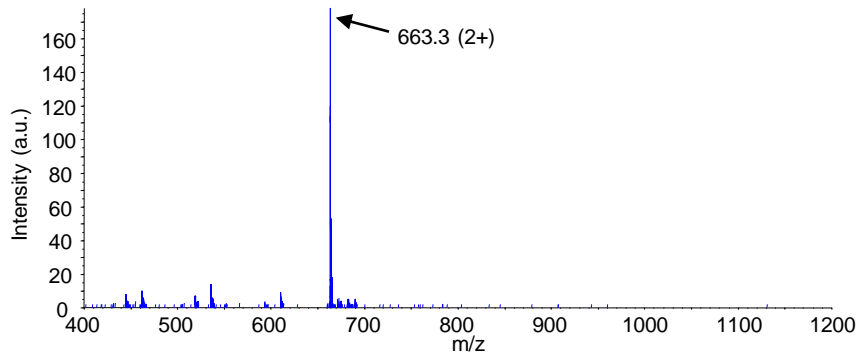

(C)

29-40 Metox. peptide mass spectrum

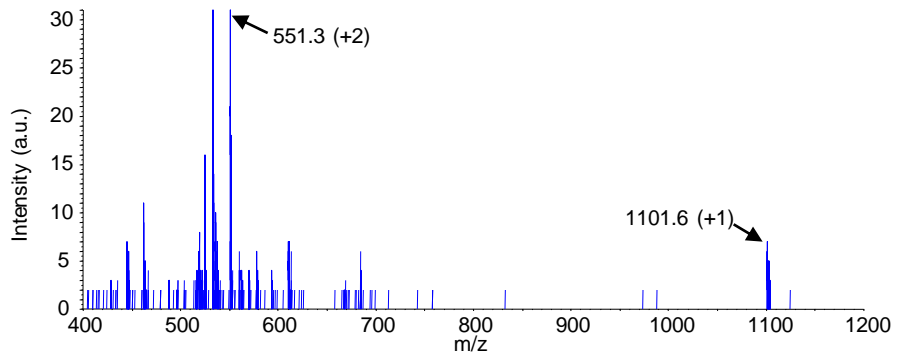

**Figure S2 7PA2 CM contains species with the A $\beta$  epitope, but without a free Asp1 Nterminus.** SEC fractions (#3-13) of CM from 7PA2 cells and from untransfected CHO- cells were each Western blotted with either 6E10 or 3D6. 6E10 revealed the presence of ~4.5 kDa A $\beta$  monomer and ~5-14 kDa bands, whereas 3D6 detected only the ~4.5 kDa monomer. M, D, and T denote the position where putative A $\beta$  monomer, dimer and trimer migrate, and the migration of molecular weight standards (in kDa) are indicated on the left.

# Figure S2

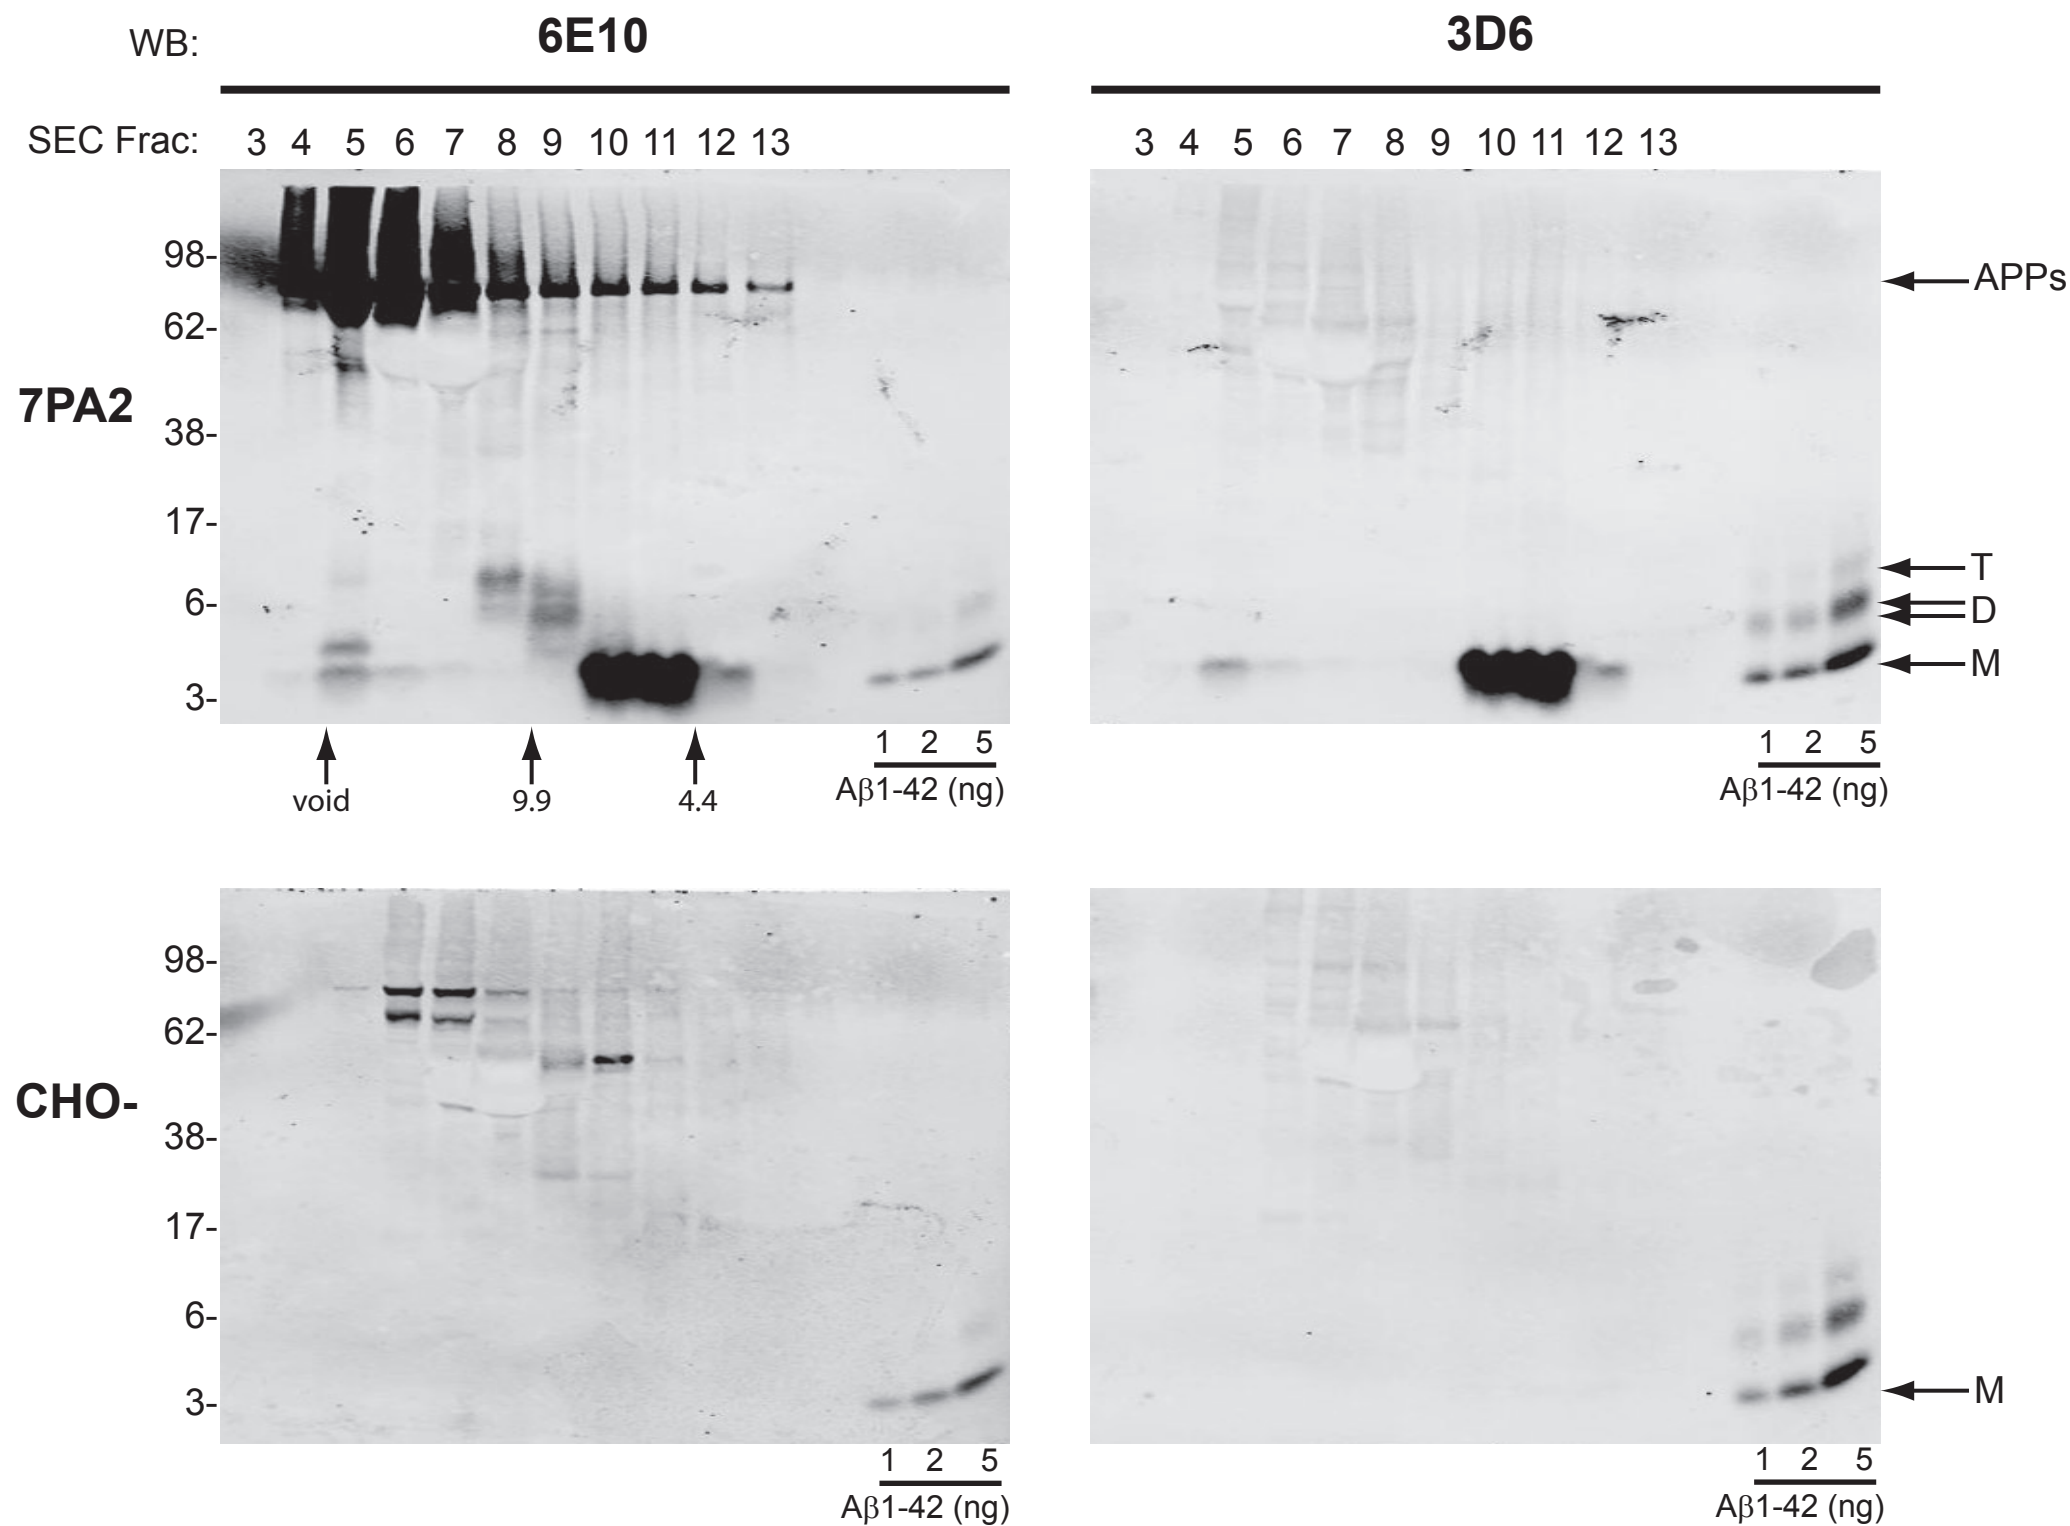

**Fig. S3 Antibody 1G6 detects 6E10-reactive species that migrate between ~8-14 kDa, whereas the Asp1 specific antibody, 82E1 detects only ~4 kDa A $\beta$  monomer.** Ten ml of 7PA2 CM was divided into 2 ml aliquots and IP'd with one of the antibodies indicated. Immunoprecipitates were washed, electrophoresed on a NuPAGE gel, transferred to nitrocellulose and Western blotted with 6E10. The Asp1-specific antibody 82E1 precipitates only monomer, whereas the Pre- $\beta$  and 1G6 antibodies do not precipitate A $\beta$  monomer, but pull down 6E10-reactive species that migrate between ~7-14 kDa. M, D, and T denote the position where putative A $\beta$  monomer, dimer and trimer migrate, and the migration of molecular weight standards (in kDa) are indicated on the left.

**Figure S3**

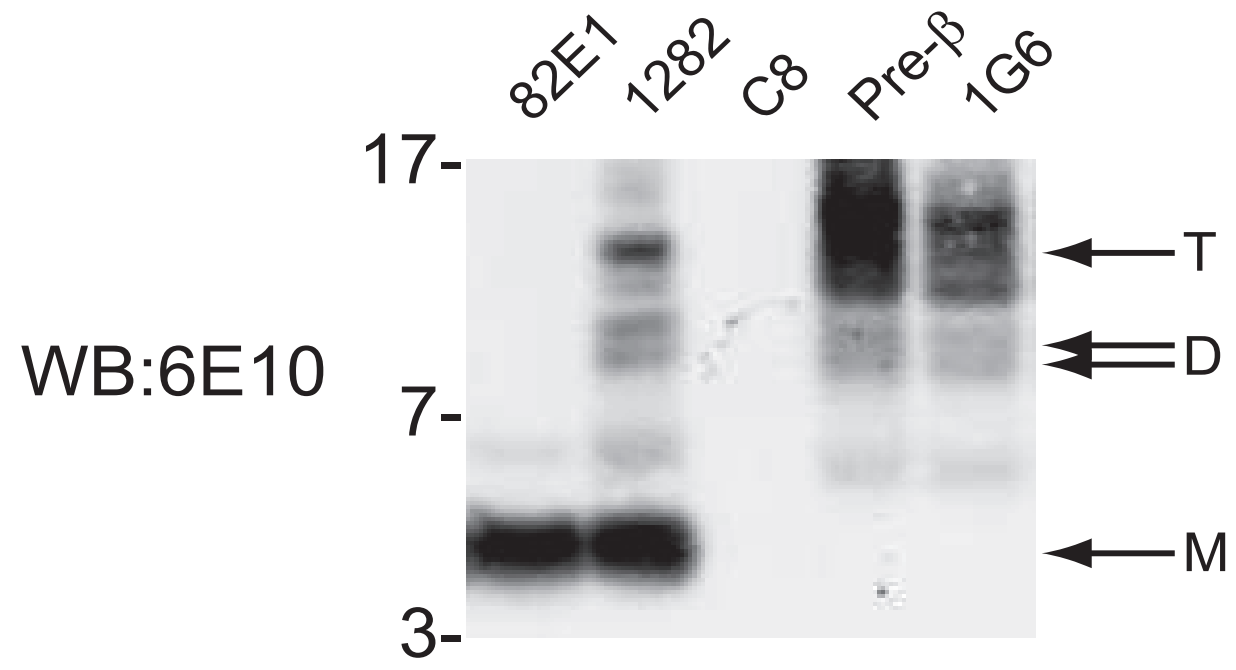

**Figure S4 The  $\beta$ -secretase inhibitor, Compound III reduces production of  $A\beta$  monomer but increases production of ~5-16 kDa  $A\beta$  immunoreactive species.** (A) and (B) Duplicate dishes of 7PA2 cells were conditioned for ~15 h in the presence or absence of the  $\gamma$ -secretase inhibitors, DAPT (10  $\mu$ M) or Compound E (1 nM); or the  $\beta$ -secretase inhibitor, Compound III (3  $\mu$ M). CM was collected from cells and used for IP with (A) R1282 and (B) pre- $\beta$ . R1282 IP's were Western blotted with a combination of anti- $A\beta$  monoclonals 6E10, 2G3 and 21F12, and the pre- $\beta$  IP's were Western blotted with 6E10 alone. Treatment of 7PA2 cells with  $\gamma$ -secretase inhibitors blocks the secretion of most species detectable by both R1282 IP and pre- $\beta$  IP. In contrast treatment with Compound III (C-III) inhibited production of  $A\beta$  monomer but significantly increased the quantity of 6E10 immunoreactive species migrating between ~5-16 kDa. M, D, and T denote the position where putative  $A\beta$  monomer, dimer and trimer migrate, and the migration of molecular weight standards (in kDa) are indicated on the left.

# Figure S4

(A)

IP: R1282  
WB: 6E10/2G3/21F12

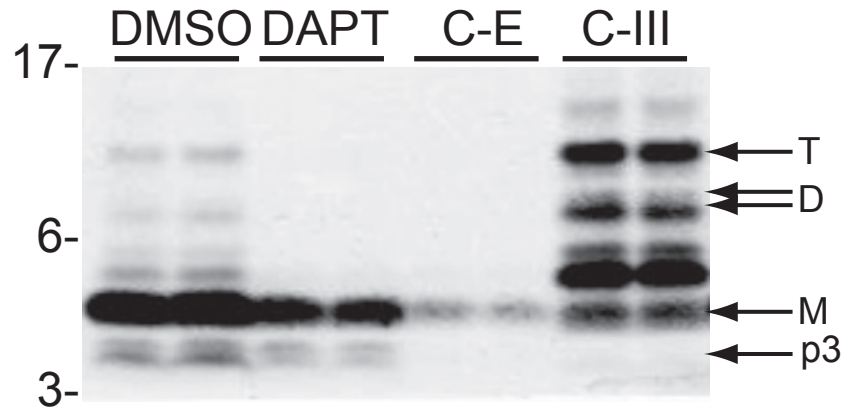

(B)

IP: pre- $\beta$   
WB: 6E10

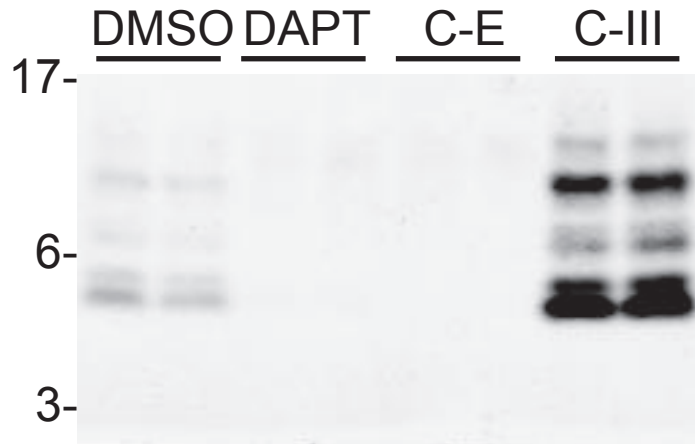

Supplement: bi5003053_si_001.pdf [file bi5003053_si_001.pdf]
